# Supplementary material for: Proof of stability of a RSV Controlled Human Infection Model challenge agent
Source: Research Square preprint supplement (doi:10.21203/rs.3.rs-3914194/v1), 2024-02-09
Supplement: Supplementary file 1 [file 2481c7d1cac251429402d2e8.docx]

**Table 2: (Infectious) viral titers from selected RSV-NICA vials.**

| **Sample ID** | **TCID50/ml (log10)** | **Average TCID50/ml ± SEM** | **PFU/ml (log10)** | **Average PFU/ml ± SEM** | **vRNA copies/ml (log10)** | **Average vRNA copies/ml ± SEM** |
| --- | --- | --- | --- | --- | --- | --- |
| **A1** | 4.50 | 4.17 ± 0.56 | 4.52 | 3.97 ± 0.45 | 8.22 | 8.28 ± 0.05 |
| **A2** | 4.83 | 4.56 | 8.26 |
| **A3** | 2.50 | 2.64 | 8.33 |
| **A4** | 4.83 | 4.18 | 8.31 |
| **B1** | 4.17 | 4.67 ± 0.17 | 3.88 | 4.75 ± 0.29 | 8.32 | 8.30 ± 0.02 |
| **B2** | 4.83 | 5.05 | 8.27 |
| **B3** | 4.83 | 5.11 | 8.29 |
| **B4** | 4.83 | 4.95 | 8.30 |
| **C1** | 4.17 | 3.72 ± 0.62 | 3.96 | 2.68 ± 1.14 | 8.26 | 8.23 ± 0.08 |
| **C2** | 2.50 | 1.00 | 8.18 |
| **C3** | 4.50 | 4.76 | 8.33 |
| **C4** |  | 1.00 | 8.16 |
| **D1** | 4.83 | 4.75 ± 0.16 | 4.49 | 4.41 ± 0.18 | 8.31 | 8.32 ± 0.03 |
| **D2** | 4.50 | 4.88 | 8.31 |
| **D3** | 4.50 | 4.04 | 8.37 |
| **D4** | 5.17 | 4.24 | 8.29 |
| **J1** | 2.50 | 3.92 ± 0.84 | 1.00 | 3.21 ± 1.02 | 8.27 | 8.29 ± 0.09 |
| **J2** | 4.83 | 4.94 | 8.37 |
| **J3** | 2.50 | 1.95 | 8.17 |
| **J4** | 5.83 | 4.95 | 8.35 |
| **L1** | 4.50 | 3.67 ± 0.69 | 4.48 | 2.79 ± 1.04 | 8.31 | 8.29 ± 0.05 |
| **L2** | 2.50 | 1.00 | 8.22 |
| **L3** | 2.50 | 1.00 | 8.28 |
| **L4** | 5.17 | 4.70 | 8.34 |

*Viral infectious titers that are shown. Lower limit of detection was set at 2.5 log10 for TCID50 and at 1 log10 for PFU.*
