# Supplementary material for: Proof of stability of a RSV Controlled Human Infection Model challenge agent
Source: Research Square preprint supplement (doi:10.21203/rs.3.rs-3914194/v1), 2024-02-09
Supplement: Supplementary file 2 [file 2b1951817bcdccdce2224251.docx]

# Additional file 3

A B
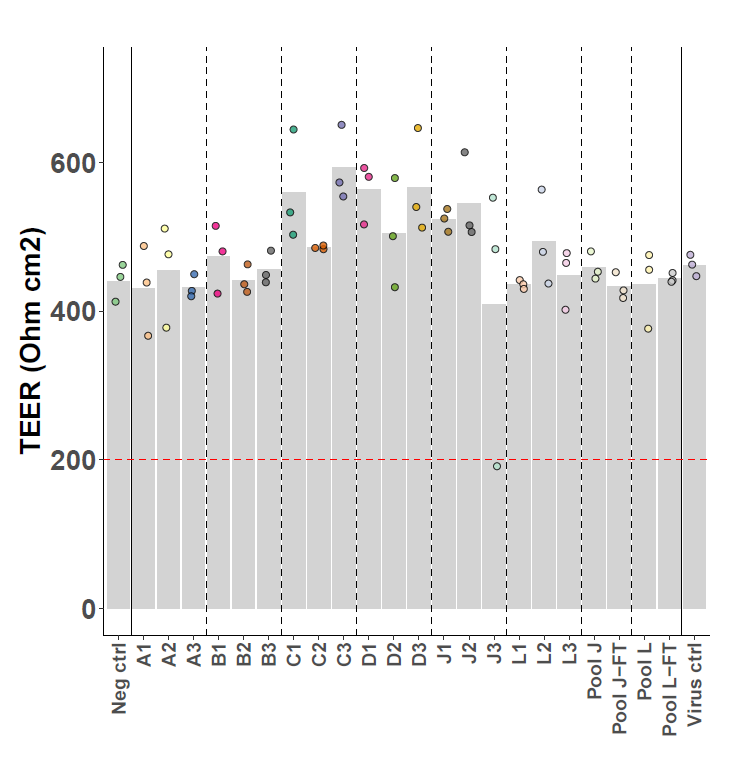

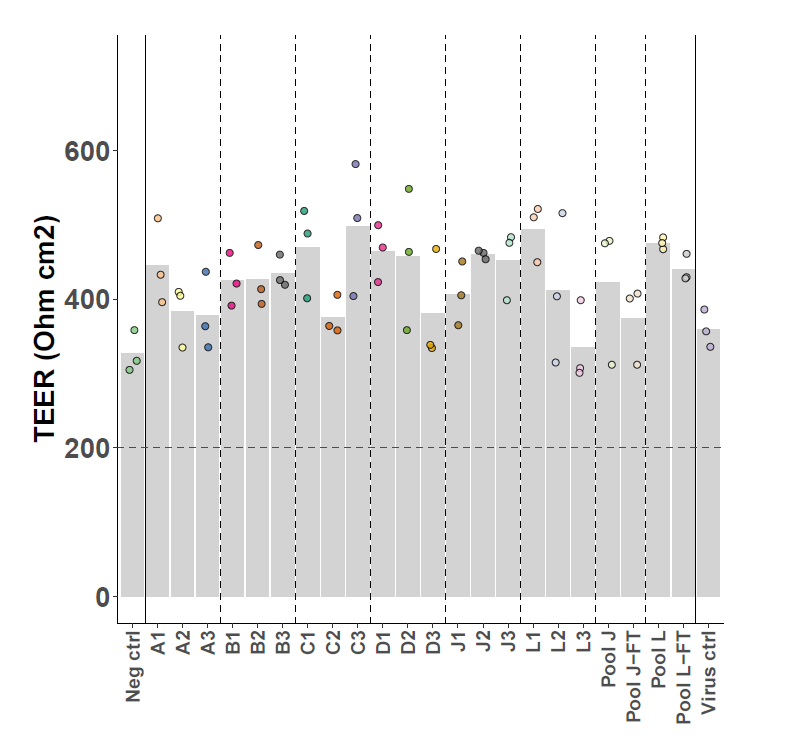


**Additional file 3: Measurement of barrier integrity (TEER, Ohm.cm²) in MucilAir™ 3 days before infection (A) and 9 days after infection (B) with different RSV-NICA aliquots.** Aliquots of the 3 vials from boxes J and L, respectively, were pooled and barrier integrity from the pools were determined before and after a freeze-thaw cycle. RSV Long-A was included as a positive virus control. Negative control did not include virus.
