# Supplementary material for: Proof of stability of a RSV Controlled Human Infection Model challenge agent
Source: Research Square preprint supplement (doi:10.21203/rs.3.rs-3914194/v1), 2024-02-09
Supplement: Supplementary file 3 [file 4cfcd3c2029371c839003a5e.docx]

**Table 3: Effect of a single freeze-thaw cycle on the infectious viral titer from RSV-NICA.**

| **Sample ID** | **Pool J** | | **Pool L** | |
| --- | --- | --- | --- | --- |
| **Freeze thaw** | **Before** | **After** | **Before** | **After** |
| **TCID50/ml** | **4.50** | **4.50** | **4.17** | **4.17** |
| **PFU/ml** | **4.46** | **4.58** | **3.04** | **2.95** |

*Viral infectious titers that are shown. Lower limit of detection was set at 2.5 log10 for TCID50 and at 1 log10 for PFU.*
