# Supplementary material for: Proof of stability of a RSV Controlled Human Infection Model challenge agent
Source: Research Square preprint supplement (doi:10.21203/rs.3.rs-3914194/v1), 2024-02-09
Supplement: Supplementary file 5 [file 789ce17c488d3c96c1b79b9f.docx]

# Additional file 2


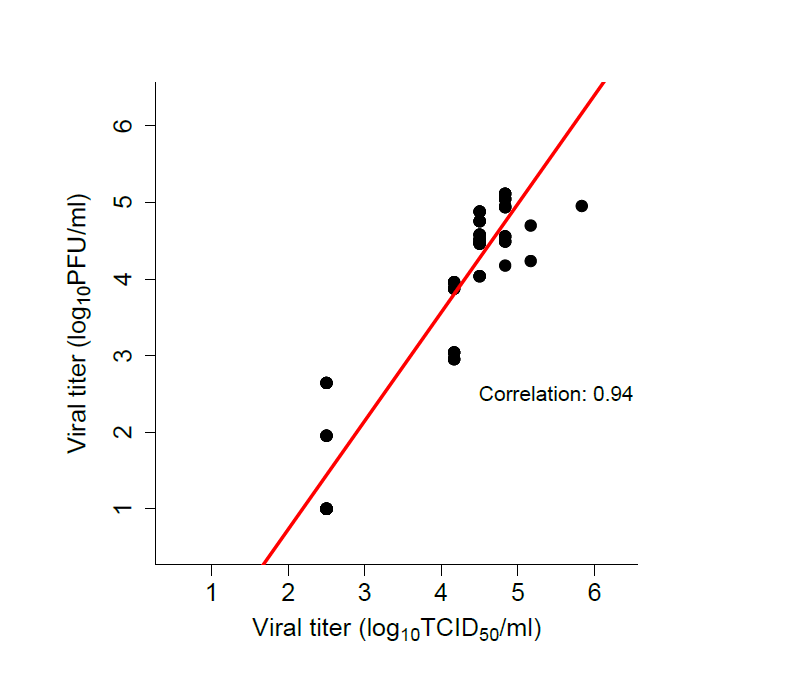


**Additional file 2: Correlation between infectious viral titers from RSV-NICA as analysed by two different methods.**
