# Supplementary material for: Proof of stability of a RSV Controlled Human Infection Model challenge agent
Source: Research Square preprint supplement (doi:10.21203/rs.3.rs-3914194/v1), 2024-02-09
Supplement: Supplementary file 6 [file a02c695e862924534a9af0a3.docx]

**Table 4: Effect of multiple freeze-thaw cycles on the infectious viral titer from RSV-NICA .**

| Sample ID | Procedure | TCID50/ml (log10) |
| --- | --- | --- |
| Pooled stock | Before aliquoting  No freeze-thaw | 5,19 |
| Pooled stock | After aliquoting  No freeze-thaw | 5,19 |
| Aliquot 1 | First freeze-thaw | 5,02 |
| Second freeze-thaw | 5,02 |
| Third freeze-thaw | 4,84 |
| Aliquot 2 | First freeze-thaw | 5,19 |
| Second freeze-thaw | 5,02 |
| Third freeze-thaw | 5,02 |
| Aliquot 3 | First freeze-thaw | 5,19 |
| Second freeze-thaw | 5,02 |
| Third freeze-thaw | 5,19 |
| Aliquot 4 | First freeze-thaw | 5,02 |
| Second freeze-thaw | 5,02 |
| Third freeze-thaw | 5,37 |
| Aliquot 5 | First freeze-thaw | 5,72 |
| Second freeze-thaw | 5,37 |
| Third freeze-thaw | 5,19 |
