# Supplementary material for: Proof of stability of a RSV Controlled Human Infection Model challenge agent
Source: Research Square preprint supplement (doi:10.21203/rs.3.rs-3914194/v1), 2024-02-09
Supplement: Supplementary file 7 [file da4c6b7b4fcbd2428c537ee9.docx]

**Table 1: TCID50 titer determination of randomly selected RSV-NICA vials.**

| **Box ID** | **Sample ID** | **TCID50/ml (log10)** | **Average TCID50/ml ± SEM** | **Box ID** | **Sample ID** | **TCID50/ml (log10)** | **Average TCID50/ml ± SEM** |
| --- | --- | --- | --- | --- | --- | --- | --- |
| **I** | **I1** | 4,80 | 4.93 ± 0.26 | **VII** | **VII1** | 2,35 | 3.22 ± 0.76 |
| **I2** | 5,67 | **VII2** | 2,52 |
| **I3** | 4,45 | **VII3** | 2,52 |
| **I4** | 4,80 | **VII4** | 5,49 |
| **II** | **II1** | 4,80 | 5.23 ± 0.15 | **VIII** | **VIII1** | 2,35 | 2.35 ± 0.00 |
| **II2** | 5,32 | **VIII2** | 2,35 |
| **II3** | 5,32 | **VIII3** | 2,35 |
| **II4** | 5,49 | **VIII4** | 2,35 |
| **III** | **III1** | 3,57 | 4.45 ± 0.34 | **IX** | **IX1** | 2,52 | 3.05 ± 0.64 |
| **III2** | 4,27 | **IX2** | 2,35 |
| **III3** | 5,15 | **IX3** | 4,97 |
| **III4** | 4,80 | **IX4** | 2,35 |
| **IV** | **IV1** | 5,49 | 5.41 ± 0.21 | **X** | **X1** | 5,49 | 5.67 ± 0.07 |
| **IV2** | 4,80 | **X2** | 5,67 |
| **IV3** | 5,67 | **X3** | 5,67 |
| **IV4** | 5,67 | **X4** | 5,84 |
| **V** | **V1** | 2,52 | 2.44 ± 0.05 | **XI** | **XI1** | 3,40 | 2.83 ± 0.24 |
| **V2** | 2,35 | **XI2** | 2,35 |
| **V3** | 2,52 | **XI3** | 2,52 |
| **V4** | 2,35 | **XI4** | 3,05 |
| **VI** | **VI1** | 2,35 | 2.35 ± 0.00 | **XII** | **XII1** | 5,15 | 4.23 ± 0.64 |
| **VI2** | 2,35 | **XII2** | 4,80 |
| **VI3** | 2,35 | **XII3** | 2,35 |
| **VI4** | 2,35 | **XII4** | 4,62 |
